# Supplementary material for: Thiocyanate copper complexes with pyrazole-derived ligands – synthesis, crystal structures, DFT calculations and magnetic properties
Source: Royal Society of Chemistry journal article supplement (doi:10.1039/c6ce01739h), 2016-01-01
Supplement: c6ce01739h1.pdf [file c6ce01739h1.pdf]

## SUPPLEMENTARY MATERIALS

### **Thiocyanate copper complexes with pyrazole-derived ligands – Synthesis, crystal structures, DFT calculations and magnetic properties**

**Anna Świtlicka-Olszewska<sup>a</sup>, Katarzyna Czerwińska<sup>a</sup>, Barbara Machura<sup>a</sup>, Mateusz Penkala<sup>b</sup>, Alina Bieńko<sup>c\*</sup>, Dariusz Bieńko<sup>d</sup>, Wiktor Zierkiewicz<sup>d</sup>**

*<sup>a</sup> Department of Crystallography, Institute of Chemistry, University of Silesia, 9<sup>th</sup> Szkolna St., 40–006 Katowice, Poland, E-mail:anna.switlicka@gmail.com*

*<sup>b</sup> Department of Inorganic, Organometallic Chemistry and Catalysis, Institute of Chemistry, University of Silesia, 9<sup>th</sup> Szkolna St., 40–006 Katowice, Poland.*

*<sup>c</sup> Faculty of Chemistry, University of Wrocław, 14 F. Joliot–Curie, 50–383 Wrocław, Poland  
E-mail: alina.bienko@chem.uni.wroc.pl*

*<sup>d</sup> Faculty of Chemistry, Wrocław University of Technology, Wybrzeże Wyspiańskiego 27, 50–370 Wrocław, Poland*

## Schemes:

**Scheme S1.** Possible coordination modes of thiocyanate ligand.

## Tables:

**Table S1.** Short intra- and intermolecular contacts detected in structures **1–4**.

**Table S2.** The selected bond lengths (Å) and angles (°) for **1**.

**Table S3.** The selected bond lengths (Å) and angles (°) for **2**.

**Table S4.** The selected bond lengths (Å) and angles (°) for **3**.

**Table S5.** The selected bond lengths (Å) and angles (°) for **4**.

**Table S6.** Selected structural data for coordination polymers incorporating thiocyanate bridge.

**Table S7.** Structural parameters of complexes  $[\text{CuL}(\text{SCN})_2]$ , where L represents a tridentate N-donor ligand

**Table S8.** NBO atomic spin density [ $\Delta$ , in e] on selected atoms in the triple state of the **1**. Level of calculations B3LYP-D3/LanL2dz.

**Table S9.** NBO atomic spin density [ $\Delta$ , in e] on selected atoms in the quartet state of the **2**. Level of calculations B3LYP-D3/LanL2dz.

**Table S10.** NBO atomic spin density [ $\Delta$ , in e] on selected atoms in the triplet state of the **3** and in the doublet state of the **3**. Level of calculations B3LYP-D3/LanL2dz.

**Table S11.** NBO atomic spin density [ $\Delta$ , in e] on selected atoms in the triplet state of the **4** dimer and in the doublet state of the **4**. Level of calculations B3LYP-D3/LanL2dz.

**Table S12.** Selected bond lengths(Å) and angles(°) for complex **1**.

**Table S13.** Selected bond lengths(Å) and angles(°) for complex **2**.

**Table S14.** Selected bond lengths(Å) and angles(°) for complex **3**.

**Table S15.** Selected bond lengths(Å) and angles(°) for complex **4**.

## Figures:

**Figure S1.** The powder XRD pattern of compounds **1–4** (experimental – red) and the simulation of the powder pattern from the crystal structure (black).

**Figure S2.** TG curves for complexes **1, 2, 3** and **4**.

**Figure S3.** X band spectrum of the complex **1**; experimental and simulated spectrum

**Figure S4.** X band spectrum of the complex **2**; experimental and simulated spectrum

**Figure S5.** X band spectrum of the complex **3**; experimental and simulated spectrum

**Figure S6.** X band spectrum of the complex **4**; experimental and simulated spectrum

**Figure S7.** IR spectrum for **1**.

**Figure S8.** IR spectrum for **2**.

**Figure S9.** IR spectrum for **3**.

**Figure S10.** IR spectrum for **4**.

**Scheme S1.** Possible coordination modes of thiocyanate ligand.

|                   |                     |                     |                       |
|-------------------|---------------------|---------------------|-----------------------|
|                   |                     |                     |                       |
| S-coordination    | N-coordination      | $\mu_{-1,3}$ -SCN   | $\mu_{-1,1}$ -NCS     |
|                   |                     |                     |                       |
| $\mu_{-1,1}$ -SCN | $\mu_{-1,1,3}$ -NCS | $\mu_{-1,1,3}$ -SCN | $\mu_{-1,1,1,3}$ -SCN |

**Table S1.** Short intra- and intermolecular contacts detected in structures 1–4.

| D—H...A               | D—H  | H...A | D...A<br>[Å] | D—H...A<br>[°] |
|-----------------------|------|-------|--------------|----------------|
| <b>1</b>              |      |       |              |                |
| O(1)–H(1O)•••S(99)    | 1.05 | 2.49  | 3.4022(17)   | 143.9          |
| N(2)–H(2A)•••O(1)     | 0.86 | 2.39  | 3.148(3)     | 147.2          |
| N(2)–H(2A)•••N(99)    | 0.86 | 2.44  | 2.893(3)     | 113.2          |
| <b>2</b>              |      |       |              |                |
| O(1)–H(1)•••S(97)     | 0.82 | 2.75  | 3.484(3)     | 149.7          |
| N(2)–H(2)•••S(97)     | 0.86 | 2.54  | 3.395(3)     | 170.6          |
| N(4)–H(4)•••O(1)      | 0.86 | 2.14  | 2.892(3)     | 146.2          |
| N(4)–H(4)•••N(98)     | 0.86 | 2.47  | 2.910(3)     | 112.2          |
| N(6)–H(6A)•••O(1)#1   | 0.86 | 2.43  | 3.102(3)     | 135.7          |
| <b>3</b>              |      |       |              |                |
| C(4)–H(4A)•••S(98)#2  | 0.97 | 2.84  | 3.748(4)     | 156.7          |
| C(8)–H(8B)•••N(99)    | 0.96 | 2.52  | 3.336(7)     | 143.2          |
| C(10)–H(10B)•••N(98)  | 0.96 | 2.57  | 3.282(7)     | 131.0          |
| <b>4</b>              |      |       |              |                |
| C(9)–H(9)•••S(98)#3   | 0.93 | 2.79  | 3.720(3)     | 175.3          |
| C(11)–H(11)•••S(99)#4 | 0.93 | 2.85  | 3.681(3)     | 149.2          |

Symmetry transformations used to generate equivalent atoms: #1: 1–x, 1–y, 1–z; #2: –x, –1/2+y, 1/2–z; #3: x, 1/2–y, –1/2+z; #4: –x, 1–y, –z

**Table S2.** The selected bond lengths (Å) and angles (°) for 1.

| Bond lengths [Å] |          | Bond angles [°]     |            |
|------------------|----------|---------------------|------------|
| Cu(1)–N(1)       | 2.015(2) | N(1)–Cu(1)–N(1)#a   | 180.00(11) |
| Cu(1)–N(99)      | 1.960(2) | N(1)–Cu(1)–N(99)    | 90.08(9)   |
| Cu(1)–S(99)#a    | 2.998(2) | N(1)–Cu(1)–N(99)#a  | 89.92(9)   |
| C(99)–N(99)      | 1.156(3) | N(99)–Cu(1)–N(99)#a | 180.00(13) |
| C(99)–S(99)      | 1.628(3) | C(99)–N(99)–Cu(1)   | 166.7(2)   |
|                  |          | C(99a)–S(99a)–Cu(1) | 92.56(1)°  |
|                  |          | N(99)–C(99)–S(99)   | 179.1(3)   |

Symmetry transformations used to generate equivalent atoms: #a: –x, –y+1, –z

**Table S3.** The selected bond lengths (Å) and angles (°) for **2**.

| Bond lengths [Å] |           | Bond angles [°]      |            |
|------------------|-----------|----------------------|------------|
| Cu(1)–N(1)       | 1.971(2)  | N(1)–Cu(1)–N(3)      | 176.34(9)  |
| Cu(1)–N(3)       | 1.983(2)  | N(1)–Cu(1)–N(98)     | 88.93(10)  |
| Cu(1)–N(98)      | 1.980(2)  | N(1)–Cu(1)–N(99)#b   | 91.20(10)  |
| Cu(1)–N(99)#b    | 1.970(2)  | N(1)–Cu(1)–S(99)     | 88.62(7)   |
| Cu(1)–S(99)      | 2.7853(9) | N(3)–Cu(1)–N(98)     | 90.95(10)  |
| Cu(2)–N(5)       | 2.009(2)  | N(3)–Cu(1)–N(99)#b   | 90.79(10)  |
| Cu(2)–N(5)#c     | 2.009(2)  | N(3)–Cu(1)–S(99)     | 87.92(7)   |
| Cu(2)–N(97)      | 1.950(3)  | N(98)–Cu(1)–S(99)    | 104.44(7)  |
| Cu(2)–N(97)#c    | 1.950(3)  | N(99)#1–Cu(1)–N(98)  | 148.84(10) |
| Cu(2)–S(98)      | 2.9705(8) | N(99)#1–Cu(1)–S(99)  | 106.71(7)  |
| Cu(2)–S(98)#c    | 2.9705(8) | N(5)#2–Cu(2)–N(5)    | 180.00(1)  |
| C(97)–N(97)      | 1.147(3)  | N(97)–Cu(2)–N(5)     | 89.54(10)  |
| C(97)–S(97)      | 1.627(3)  | N(97)–Cu(2)–N(5)#2   | 89.54(10)  |
| C(98)–N(98)      | 1.151(3)  | N(97)#2–Cu(2)–N(5)   | 89.54(10)  |
| C(98)–S(98)      | 1.623(3)  | N(97)#2–Cu(2)–N(5)#c | 90.46(10)  |
| C(99)–N(99)      | 1.159(3)  | N(97)–Cu(2)–N(97)#c  | 180.00(11) |
| C(99)–S(99)      | 1.630(3)  | N(97)–Cu(2)–S(98)    | 91.25(9)   |
|                  |           | S(98)–Cu(2)–S(98)#c  | 180.00(2)  |

Symmetry transformations used to generate equivalent atoms: #b:  $-x, -y+2, -z$ ; #c:  $-x+1, -y+1, -z+1$

**Table S4.** The selected bond lengths (Å) and angles (°) for **3**.

| Bond lengths [Å] |            | Bond angles [°]     |            |
|------------------|------------|---------------------|------------|
| Cu(1)–N(1)       | 2.046(4)   | N(1)–Cu(1)–N(3)     | 86.97(14)  |
| Cu(1)–N(3)       | 2.067(3)   | N(1)–Cu(1)–N(97)    | 93.85(15)  |
| Cu(1)–N(97)      | 2.130(4)   | N(1)–Cu(1)–N(98)    | 163.51(16) |
| Cu(1)–N(98)      | 1.959(4)   | N(1)–Cu(1)–N(99)    | 90.73(16)  |
| Cu(1)–N(99)      | 1.983(4)   | N(3)–Cu(1)–N(97)    | 92.94(15)  |
| Cu(2)–N(5)       | 2.099(4)   | N(3)–Cu(1)–N(98)    | 87.88(16)  |
| Cu(2)–N(7)       | 2.054(4)   | N(3)–Cu(1)–N(99)    | 164.44(15) |
| Cu(2)–S(97)      | 2.2752(15) | N(97)–Cu(1)–N(98)   | 102.05(16) |
| Cu(2)–S(99)      | 2.4564(14) | N(97)–Cu(1)–N(99)   | 102.57(15) |
|                  |            | N(98)–Cu(1)–N(99)   | 90.03(17)  |
|                  |            | N(5)–Cu(2)–N(7)     | 90.85(14)  |
|                  |            | N(5)–Cu(2)–S(97)    | 120.18(11) |
|                  |            | N(5)–Cu(2)–S(99)    | 100.63(11) |
|                  |            | N(7)–Cu(2)–S(97)    | 118.15(13) |
|                  |            | N(7)–Cu(2)–S(99)    | 115.54(11) |
|                  |            | S(97)–Cu(2)–S(99)   | 109.50(5)  |
|                  |            | C(97)–N(97)–Cu(1)   | 171.1(4)   |
|                  |            | C(98)–N(98)–Cu(1)   | 174.0(4)   |
|                  |            | C(99)–N(99)–Cu(1)   | 174.1(4)   |
|                  |            | C(97)#e–S(97)–Cu(2) | 95.55(17)  |
|                  |            | C(99)–S(99)–Cu(2)   | 111.40(17) |
|                  |            | N(97)–C(97)–S(97)#d | 178.5(4)   |
|                  |            | N(98)–C(98)–S(98)   | 179.3(4)   |
|                  |            | N(99)–C(99)–S(99)   | 178.8(4)   |

Symmetry transformations used to generate equivalent atoms: #d:  $x, y+1, z$ ; #e:  $x, y-1, z$

**Table S5.** The selected bond lengths (Å) and angles (°) for **4**.

| Bond lengths [Å] |            | Bond angles [°]   |            |
|------------------|------------|-------------------|------------|
| Cu(1)–N(1)       | 2.029(2)   | N(1)–Cu(1)–N(3)   | 78.06(8)   |
| Cu(1)–N(3)       | 1.9562(19) | N(1)–Cu(1)–N(5)   | 151.24(8)  |
| Cu(1)–N(5)       | 2.080(2)   | N(1)–Cu(1)–N(98)  | 107.25(8)  |
| Cu(1)–N(98)      | 2.134(2)   | N(1)–Cu(1)–N(99)  | 96.87(9)   |
| Cu(1)–N(99)      | 1.911(2)   | N(3)–Cu(1)–N(5)   | 77.74(8)   |
| C(98)–N(98)      | 1.150(3)   | N(3)–Cu(1)–N(98)  | 95.80(9)   |
| C(98)–S(98)      | 1.634(3)   | N(3)–Cu(1)–N(99)  | 165.78(10) |
| C(99)–N(99)      | 1.151(3)   | N(5)–Cu(1)–N(98)  | 90.47(9)   |
| C(99)–S(99)      | 1.614(3)   | N(5)–Cu(1)–N(99)  | 102.87(9)  |
|                  |            | N(98)–Cu(1)–N(99) | 98.40(10)  |
|                  |            | N(2)–N(1)–Cu(1)   | 112.78(14) |
|                  |            | N(4)–N(5)–Cu(1)   | 110.54(15) |
|                  |            | C(1)–N(1)–Cu(1)   | 141.84(19) |
|                  |            | C(4)–N(3)–Cu(1)   | 120.19(15) |
|                  |            | C(8)–N(3)–Cu(1)   | 119.88(17) |
|                  |            | C(11)–N(5)–Cu(1)  | 141.55(18) |
|                  |            | C(98)–N(98)–Cu(1) | 172.9(2)   |
|                  |            | C(99)–N(99)–Cu(1) | 152.0(2)   |

**Table S6.** Selected structural data for copper(II) coordination polymers incorporating thiocyanate bridge.

| Compound                                                                  | Bond lengths [Å]                                                                             |                       |                        |                                              |                                              |                      | Bond angles [°]      |                    | Cu...Cu [Å]           | Ref. |
|---------------------------------------------------------------------------|----------------------------------------------------------------------------------------------|-----------------------|------------------------|----------------------------------------------|----------------------------------------------|----------------------|----------------------|--------------------|-----------------------|------|
|                                                                           | Cu–N <sub>L</sub>                                                                            | Cu–N <sub>NCS</sub>   | Cu–S <sub>NCS</sub>    | N–C <sub>NCS</sub>                           | C–S <sub>NCS</sub>                           | N–C–S                | Cu–N–CS              | Cu–S–CN            |                       |      |
|                                                                           | <b>double <math>\mu</math>-<sub>1,3</sub>-NCS</b>                                            |                       |                        |                                              |                                              |                      |                      |                    |                       |      |
| [Cu(py) <sub>2</sub> (NCS) <sub>2</sub> ] <sub>n</sub>                    | 2.049(2)<br>2.055(2)                                                                         | 1.936 (2)<br>1.932(2) | 3.045 (2)<br>3.085(2)  | 1.156(3)<br>1.155(3)                         | 1.628(2)<br>1.628(2)                         | 179.1(2)<br>179.2(2) | 167.8(1)<br>169.3(2) | 93.2(7)<br>92.1(8) | 5.6477(4)             | 34   |
| [Cu(NCS) <sub>2</sub> (hmtpo)(H <sub>2</sub> O) <sub>2</sub> ]            | 2.074(2)                                                                                     | 1.938(3)              | 2.959(1)               | 1.150(4)                                     | 1.643(3)                                     | 179.4(3)             | 163.1(3)             | 102.6(1)           | 5.4991(1)             | 35   |
| [Cu(meimi) <sub>2</sub> (NCS) <sub>2</sub> ] <sub>n</sub>                 | 2.013(2)                                                                                     | 1.963 (2)             | 3.221 (1)              | 1.154 (4)                                    | 1.624 (3)                                    | 178.8 (3)            | 167.8 (2)            | 91.5(2)            | 5.720(1)              | 36   |
| [Cu(im) <sub>2</sub> (NCS) <sub>2</sub> ]                                 | 2.033(2)                                                                                     | 1.975(2)              | 3.135(52)              | 1.164(3)                                     | 1.646(3)                                     | 176.8(2)             | 160.96(19)           | 93.1(3)            | 5.720(1)              | 37   |
| [Cu(im) <sub>2</sub> (NCS) <sub>2</sub> ] <sub>n</sub>                    | 2.011(2)                                                                                     | 1.966(2)              | 3.1141(6)              | 1.155(3)                                     | 1.633(8)                                     | 177.0(8)             | 161.2(1)             | 93.1(5)            | 5.722(4)              | 38   |
| [Cu(bpm)(NCS) <sub>2</sub> ] <sub>n</sub>                                 | 2.009(6)                                                                                     | 1.941(6)              | 3.174(2)               | 1.412(9)                                     | 1.638(6)                                     | 179.6(7)             | 165.0(6)             | 83.1(2)            | 5.921(2)              | 39   |
| [Cu(apo)(NCS) <sub>2</sub> ] <sub>n</sub>                                 | 2.083(2)<br>1.999(2)                                                                         | 1.934(2)              | 2.952(1)               | 1.150(1)                                     | 1.643(2)                                     | 178.2(3)             | 173.4(1)             | 98.0(7)            | 5.573(1)              | 36   |
| [Cu(bipy)(NCS) <sub>2</sub> ]                                             | 1.996(8)                                                                                     | 2.012(7)              | 3.239(4)               | 1.056(7)                                     | 1.674(7)                                     | 167.9(10)            | 165.1(3)             | 104.7(3)           | 6.113(2)              | 41   |
| [Cu(pyim)(NCS) <sub>2</sub> ] <sub>n</sub>                                | 2.001(11)<br>2.014(9)                                                                        | 1.987(10)             | 3.171(3)               | 1.159(13)                                    | 1.639(15)                                    | 178.3(11)            | 168.3(9)             | 104.2(5)           | 6.079(11)             | 38   |
|                                                                           | <b>single <math>\mu</math>-<sub>1,3</sub>-NCS</b>                                            |                       |                        |                                              |                                              |                      |                      |                    |                       |      |
| [Cu(tmeda)(NCS) <sub>2</sub> ] <sub>n</sub>                               | 2.071(2)<br>2.039(2)                                                                         | 1.982(2)              | 2.825(4)               | 1.635(3)<br>1.618(3)                         | 1.166(4)<br>1.168(4)                         | 178.4(2)             | 153.2(2)             | 109.00(9)          | 5.580(1)              | 42   |
| [Cu(detam)(NCS) <sub>2</sub> ] <sub>n</sub>                               | 1.974 (2)<br>2.090 (2)                                                                       | 2.8240(7)             | 2.8240(7)              | 1.628(2)                                     | 1.157(3)                                     | 178.8(2)             | 172.7(2)             | 100.38(8)          | 5.8539(5)             | 43   |
| [Cu(dpk·CH <sub>3</sub> OH)(NCS) <sub>2</sub> ] <sub>n</sub>              | 2.026(5)<br>2.032(2)                                                                         | 1.969(3)              | 2.837(1)               | 1.145(4)                                     | 1.637(3)                                     | 179.1(3)             | 164.4(3)             | 100.6(1)           | 5.994(1)              | 44   |
| [Cu(pyoxaz)(NCS) <sub>2</sub> ] <sub>n</sub>                              | 2.048(3)<br>2.020(3)                                                                         | 1.959(3).             | 2.271(1)               | 1.159(5)                                     | 1.621(4)                                     | 178.5(4)             | 146.5(3)             | 97.6(1)            | 5.599(6)              | 45   |
| {[Cu <sub>2</sub> (bpzm) <sub>2</sub> (SCN) <sub>4</sub> ] <sub>n</sub> } | 1.998(2)<br>2.010(2)<br>2.003(2)<br>2.006(2)<br>2.000(2)<br>2.013(2)<br>1.995(2)<br>2.004(2) | 1.945(2);<br>1.956(3) | 2.7387(9)<br>2.7286(8) | 1.138(4)<br>1.142(4)<br>1.148(4)<br>1.150(3) | 1.630(3)<br>1.636(3)<br>1.637(3)<br>1.635(3) | 179.5(3)<br>178.7(3) | 168.0(3)<br>170.1(2) | 91.2(1)<br>94.1(1) | 5.6043(5)<br>5.435(5) | 13   |
| [Cu(btbt)(NCS) <sub>2</sub> ] <sub>n</sub>                                | 1.997(1)                                                                                     | 1.966(2)              | 2.9878(1)              | 1.159(2)                                     | 1.625(2)                                     | 178.1(2)             | 157.8(2)             | 105.5(4)           | 6.3634(9)             | 46   |
| [Cu(isn) <sub>2</sub> (NCS) <sub>2</sub> ] <sub>n</sub>                   | 2.044(1)                                                                                     | 1.950(1)              | 2.9498(4)              | 1.153(2)                                     | 1.628(1)                                     | 179.1(1)             | 159.2(1)             | 102.0(1)           | 6.168(9)              | 47   |
| [Cu(dmtam)(NCS) <sub>2</sub> ] <sub>n</sub>                               | 1.986 (4)<br>2.067 (4)                                                                       | 1.961 (4)             | 2.8386(17)             | 1.139(9)                                     | 1.649(7)                                     | 178.6(6)             | 160.8(5)             | 91.0(2)            | 5.222(1)              | 48   |

|                                                                         |                                                                      |                      |                      |                        |                       |                                              |                                              |                     |                      |    |
|-------------------------------------------------------------------------|----------------------------------------------------------------------|----------------------|----------------------|------------------------|-----------------------|----------------------------------------------|----------------------------------------------|---------------------|----------------------|----|
| [Cu(pytr)(NCS) <sub>2</sub> ] <sub>n</sub>                              | 2.060(4)<br>1.991(4)                                                 | 1.968(5)             | 2.671(2)             | 1.150(7)               | 1.641(5)              | 179.4(5)                                     | 170.1(4)                                     | 93.2(2)             | 5.546(1)             | 49 |
| [Cu <sub>2</sub> (tacte) <sub>2</sub> (NCS) <sub>4</sub> ] <sub>n</sub> | 1.935(4)<br>2.037(4)<br>2.032(4)<br>1.937(4)<br>2.034(5)<br>2.042(5) | 2.306(5)             | 2.768(2)             | 1.129(8)               | 1.632(6)              | 178.6(6)                                     | 138.8(5)                                     | 103.1(2)            | 6.633(4)             | 50 |
| [Cu(dach)(NCS) <sub>2</sub> ] <sub>n</sub>                              | 1.998(11)<br>2.001(11)                                               | 1.959(14)            | 2.769(4)             | 1.11(2)                | 1.65(2)               | 176.7(14)                                    | 169.1(13)                                    | 90.3(5)             | 5.270(2)             | 51 |
| [Cu(bim)(NCS) <sub>2</sub> ] <sub>n</sub>                               | 2.0146(14)<br>2.0032(14)                                             | 1.9490(16)           | 2.6744(6)            | 1.145(2)               | 1.6312(18)            | 178.62(18)                                   | 170.47(16)                                   | 97.57(7)            | 5.6744(3)            | 52 |
| [Cu(bpy)(NCS) <sub>2</sub> ]                                            | 2.003(6)<br>2.010(7)<br>2.008(7)<br>2.003(7)                         | 1.956(7)<br>1.931(8) | 2.728(3)<br>4.629(2) | 1.155(11)<br>1.155(10) | 1.645(10)<br>1.604(9) | 176.8(8)<br>178.6(8)<br>178.4(8)<br>178.3(9) | 163.6(8)<br>168.3(8)<br>164.8(8)<br>169.0(7) | 97.9(3)<br>104.5(4) | 5.909(2)<br>6.103(2) | 53 |
| [Cu(4-apy) <sub>2</sub> (SCN) <sub>2</sub> ] <sub>n</sub>               | 2.023(2)<br>2.021(2)                                                 | 1.943(3)             | 2.867(1)             | 1.144(4)               | 1.630(3)              | 179.0(3)                                     | 168.4(4)                                     | 87.0(2)             | 5.495(1)             | 54 |
| [Cu(ambzim)(SCN) <sub>2</sub> ] <sub>n</sub>                            | 1.975(3)<br>2.025(4)                                                 | 1.951(4)             | 2.9521(13)           | 1.155(6)               | 1.635(5)              | 178.4(4)                                     | 168.5(4)                                     | 93.3(1)             | 5.540                | 54 |
| [Cu(hambi)(NCS) <sub>2</sub> ] <sub>n</sub>                             | 1.970 (4)<br>2.022 (4)                                               | 1.935(4)             | 2.942(1)             | 1.154(6)               | 1.625(6)              | 178.9 (5)                                    | 169.2(4)                                     | 87.2(2)             | 5.523(2)             | 55 |

**Table S7.** Structural parameters of complexes [CuL(SCN)<sub>2</sub>], where L represents a tridentate N-donor ligand

| Compound                                                           | Geometry | $\tau$ | Bond lengths [Å]                    |                        |                     |                        |                        | Bond angles [°]        |                        |         | Ref. |
|--------------------------------------------------------------------|----------|--------|-------------------------------------|------------------------|---------------------|------------------------|------------------------|------------------------|------------------------|---------|------|
|                                                                    |          |        | Cu-N <sub>L</sub>                   | Cu-N <sub>NCS</sub>    | Cu-S <sub>NCS</sub> | N-C <sub>NCS</sub>     | C-S <sub>NCS</sub>     | N-C-S                  | Cu-N-CS                | Cu-S-CN |      |
| [Cu(NCS) <sub>2</sub> (mbpyam)]·0.5CH <sub>2</sub> Cl <sub>2</sub> | SP       | 0.0    | 2.039 (4)                           | 1.936 (4)              | –                   | 1.162 (7)              | 1.629 (5)              | 178.3 (4)              | 140.7 (3)              | –       | 58   |
|                                                                    | SP       | 0.10   | 1.998 (3)<br>2.016 (3)              | 2.199 (3)              | –                   | 1.151 (6)              | 1.634 (4)              | 179.4 (4)              | 160.1 (3)              | –       |      |
|                                                                    |          |        | 2.009 (3)<br>2.023 (4)<br>2.034 (4) | 2.196 (3)<br>1.943 (5) | –                   | 1.157 (6)<br>1.155 (7) | 1.638 (5)<br>1.614 (5) | 178.4 (5)<br>179.2 (4) | 151.1 (3)<br>159.9 (3) | –       |      |
|                                                                    |          |        |                                     |                        |                     |                        |                        |                        |                        |         |      |
| [Cu(L <sup>1</sup> )(NCS) <sub>2</sub> ]                           | SP       | 0.09   | 2.034(3)<br>2.024(3)                | 2.268(4)<br>1.959(3)   | –                   | 1.158(6)<br>1.150(6)   | 1.635(5)<br>1.631(5)   | 178.9(4)<br>178.7(4)   | 170.1(3)<br>147.1(3)   | –       | 60   |

|                                         |    |      |            |            |   |            |            |            |            |   |    |
|-----------------------------------------|----|------|------------|------------|---|------------|------------|------------|------------|---|----|
|                                         |    |      | 2.010(3)   |            |   |            |            |            |            |   |    |
| <b>[Cu(buterpy)(NCS)<sub>2</sub>]</b>   | SP | 0.05 | 2.045(5)   | 2.105(5)   | – | 1.167(7)   | 1.634(6)   | 178.3(5)   | 175.2(4)   | – | 61 |
|                                         | SP | 0.16 | 1.957(4)   | 1.971(5)   |   | 1.159(7)   | 1.623(6)   | 179.2(5)   | 147.7(4)   |   |    |
|                                         |    |      | 2.029(4)   | 2.132(5)   |   | 1.159(7)   | 1.656(6)   | 179.7(5)   | 176.9(5)   |   |    |
|                                         |    |      | 2.053(5)   | 1.930(4)   |   | 1.157(7)   | 1.620(6)   | 178.9(5)   | 153.9(4)   |   |    |
|                                         |    |      | 1.940(4)   |            |   |            |            |            |            |   |    |
|                                         |    |      | 2.040(5)   |            |   |            |            |            |            |   |    |
| <b>[Cu(mpiq)(NCS)<sub>2</sub>]</b>      | SP | 0.11 | 2.0239(12) | 1.9887(13) | – | 1.1644(19) | 1.6276(16) | 179.44(14) | 162.18(12) | – | 70 |
|                                         |    |      | 2.0218(11) | 2.0624(13) |   | 1.160(2)   | 1.6257(15) | 178.50(15) | 146.07(13) |   |    |
|                                         |    |      | 2.0658(12) |            |   |            |            |            |            |   |    |
| <b>[Cu(bpzeaT)(SCN)<sub>2</sub>]</b>    | SP | 0.15 | 1.942(3)   | 1.956(3)   | – | 1.159(5)   | 1.618(5)   | 177.8(4)   | 170.1(4)   | – | 73 |
|                                         |    |      | 2.102(3)   | 2.134(4)   |   | 1.140(6)   | 1.606(4)   | 179.5(4)   | 172.8(4)   |   |    |
|                                         |    |      | 2.101(3)   |            |   |            |            |            |            |   |    |
| <b>[Cu(dpymedam)(NCS)<sub>2</sub>]</b>  | SP | 0.18 | 2.053 (4)  | 1.921 (4)  | – | 1.117(7)   | 1.610(5)   | 179.81(5)  | 168.02(5)  | – | 62 |
|                                         |    |      | 1.954 (3)  | 2.151 (5)  |   | 1.146(7)   | 1.593(5)   | 178.81(4)  | 166.44(4)  |   |    |
|                                         |    |      | 2.096 (4)  |            |   |            |            |            |            |   |    |
| <b>[Cu(bzbedmpza)(NCS)<sub>2</sub>]</b> | SP | 0.26 | 1.992(5)   | 1.969(4)   | – | 1.150(6)   | 1.610(5)   | 179.5(5)   | 155.2(5)   | – | 63 |
|                                         |    |      | 2.238(4)   | 1.993(4)   |   | 1.146(6)   | 1.617(5)   | 178.1(5)   | 156.5(5)   |   |    |
|                                         |    |      | 1.990(5)   |            |   |            |            |            |            |   |    |
| <b>[Cu(bdmpzpy)(NCS)<sub>2</sub>]</b>   | SP | 0.25 | 2.0295(10) | 1.9845(11) | – | 1.1692(17) | 1.6300(13) | 179.01(11) | 151.00(10) | – | 64 |
|                                         |    |      | 2.0689(9)  | 2.1225(10) |   | 1.1637(16) | 1.6299(12) | 178.67(11) | 176.42(10) |   |    |
|                                         |    |      | 2.0355(10) |            |   |            |            |            |            |   |    |
| <b>[Cu(dipyp) (NCS)<sub>2</sub>]</b>    | SP | 0.26 | 2.038 (3)  | 2.131 (3)  | – | 1.164(4)   | 1.615(3)   | 178.2 (3)  | 153.45(3)  | – | 66 |
|                                         |    |      | 2.041 (3)  | 1.974 (3)  |   | 1.149(4)   | 1.620(5)   | 179.1 (4)  | 177.94(3)  |   |    |
|                                         |    |      | 2.071 (3)  |            |   |            |            |            |            |   |    |
| <b>[Cu(mebedmpza)(NCS)<sub>2</sub>]</b> | SP | 0.26 | 2.013(3)   | 1.982(3)   | – | 1.159(5)   | 1.623(3)   | 179.1(3)   | 166.7(3)   | – | 63 |
|                                         |    |      | 2.181(4)   | 1.982(3)   |   |            |            |            |            |   |    |
|                                         |    |      | 2.013(3)   |            |   |            |            |            |            |   |    |
| <b>[Cu(ipracn)(NCS)<sub>2</sub>]</b>    | SP | 0.27 | 2.254(3)   | 1.966(3)   | – | 1.150(4)   | 1.616(4)   | 178.9(4)   | 155.9(3)   | – | 74 |
|                                         |    |      | 2.102(4)   | 1.952(3)   |   | 1.161(4)   | 1.608(4)   | 178.8(4)   | 161.8(3)   |   |    |
|                                         |    |      | 2.087(3)   |            |   |            |            |            |            |   |    |
| <b>[Cu(dpvetam)(NCS)<sub>2</sub>]</b>   | SP | 0.28 | 2.211 (3)  | 1.963 (3)  | – | 1.141(1)   | 1.689(2)   | 178.14(3)  | 167.8(3)   | – | 67 |
|                                         |    |      | 2.061 (2)  | 1.958 (3)  |   | 1.141(1)   | 1.607(3)   | 179.64(3)  | 160.5(3)   |   |    |
|                                         |    |      | 2.222 (3)  |            |   |            |            |            |            |   |    |
| <b>[Cu(dpdiham)(NCS)<sub>2</sub>]</b>   | SP | 0.28 | 2.047 (3)  | 2.153 (3)  | – | 1.126 (4)  | 1.600 (4)  | 178.9 (4)  | 152.2 (3)  | – | 68 |
|                                         |    |      | 2.013 (3)  | 1.955 (3)  |   | 1.151 (4)  | 1.622 (4)  | 179.4 (3)  | 169.4 (3)  |   |    |
|                                         |    |      | 2.078 (3)  |            |   |            |            |            |            |   |    |
| <b>[Cu(dpt)(NCS)<sub>2</sub>]</b>       | SP | 0.30 | 2.037      | 2.140      | – | 1.142      | 1.620      | 178.4(2)   | 169.6(4)   | – | 69 |



|                                                 |              |              |                                        |                          |            |                          |                          |                          |                          |           |    |
|-------------------------------------------------|--------------|--------------|----------------------------------------|--------------------------|------------|--------------------------|--------------------------|--------------------------|--------------------------|-----------|----|
|                                                 |              |              | 2.061<br>2.020                         | 2.037                    |            | 1.150                    | 1.620                    | 178.9(7)                 | 168.1(2)                 |           |    |
| <b>[Cu(tppz)(SCN)<sub>2</sub>]</b>              | SP           | 0.31         | 1.946(2)<br>2.011(3)<br>2.014(3)       | 1.907(3)<br>2.692(3)     | –          | 1.163(4)<br>1.139(5)     | 1.612(3)<br>1.630(4)     | 178.8(4)<br>179.3(4)     | 163.1(3)<br>115.3(3)     | –         | 16 |
| <b>[Cu(mpipq)(NCS)<sub>2</sub>]</b>             | SP           | 0.33         | 2.0269(9)<br>2.0824(10)<br>2.0243(10)  | 2.1074(10)<br>1.9477(10) | –          | 1.1637(15)<br>1.1656(15) | 1.6334(12)<br>1.6315(11) | 179.10(12)<br>178.67(11) | 158.65(10)<br>167.65(10) | –         | 70 |
| <b>[Cu(me<sub>3</sub>dpt)(NCS)<sub>2</sub>]</b> | SP<br>SP/TBY | 0.37<br>0.49 | 2.026(3)<br>2.190(3)<br>1.994(3)       | 1.994(3)<br>2.003(3)     | –          | 1.157(4)<br>1.158(4)     | 1.627(4)<br>1.640(4)     | 178.9(3)<br>179.0(3)     | 173.6(3)<br>171.1(3)     | –         | 9  |
|                                                 |              |              | 2.203(3)<br>2.028(3)<br>2.046(3)       | 2.010(3)<br>1.992(3)     | –          | 1.166(5)<br>1.157(4)     | 1.625(4)<br>1.640(4)     | 179.2(3)<br>178.8(3)     | 164.4(3)<br>174.3(3)     | –         |    |
| <b>[Cu(pyetam)(NCS)<sub>2</sub>]</b>            | SP/TBY       | 0.48         | 2.002(6)<br>2.125(8)<br>1.994(6)       | 1.97(2)<br>2.098(9)      | –          | 1.137(1)<br>1.140(1)     | 1.637(9)<br>1.597(9)     | 178.41(8)<br>179.13(8)   | 175.81(7)<br>170.38(8)   | –         | 59 |
| <b>[Cu(terpy)(NCS)<sub>2</sub>]</b>             | SP/BPY       | 0.53         | 2.021(5)<br>2.021(5)<br>1.937(7)       | 2.020(7)                 | –          | 1.157(11)                | 1.631(8)                 | 178.4(6)<br>178.4(6)     | 156.6 (5)<br>156.6 (5)   | –         | 72 |
| <b>[Cu(bedmpza)(NCS)<sub>2</sub>MeOH]</b>       | BPY          | 0.76         | 2.0067(12)<br>2.1309(12)<br>2.0140(12) | 1.9967(13)<br>1.9908(13) | –          | 1.1564(19)<br>1.1606(19) | 1.6277(15)<br>1.6301(14) | 178.61(14)<br>178.20(14) | 164.51(13)<br>168.22(13) | –         | 71 |
| <b>S–coordinated thiocyanate ion</b>            |              |              |                                        |                          |            |                          |                          |                          |                          |           |    |
| <b>[Cu(L<sup>2</sup>)(NCS)<sub>2</sub>]</b>     | SP           | 0.03         | 1.993(4)<br>2.048(4)<br>1.993(4)       | 1.951(5)                 | 2.682(1)   | 1.142(7)<br>1.177(8)     | 1.646(6)<br>1.619(6)     | 179.47(5)<br>177.92(5)   | 159.1(4).                | 100.5(2). | 60 |
| <b>[Cu(apscarb)(NCS)<sub>2</sub>]</b>           | SP           | 0.18         | 1.974(3)<br>1.957(3)<br>2.011(3)       | 1.908(3)                 | 2.684(2)   | 1.271(4)<br>1.367(4)     | 1.772(4)<br>1.740(3)     | 178.6(4)<br>177.4(4)     | 168.8(3)                 | 99.787(2) | 75 |
| <b>[Cu(bbp)(NCS)<sub>2</sub>MeOH]</b>           | SP           | 0.18         | 1.980(2)<br>2.156(5)<br>2.142(4)       | 1.918(2)                 | 2.5777(17) | 1.150(3)<br>1.177(4)     | 1.630(3)<br>1.662(3)     | 178.7(3)<br>177.1(3)     | 163.7(3)                 | 97.29(11) | 73 |
| <b>[Cu(pyterpy)(NCS)<sub>2</sub>]</b>           | SP           | 0.25         | 2.029 (3)<br>1.924 (2)<br>2.029 (3)    | 1.909 (3)                | 2.818(4)   | 1.147(2)<br>1.139(3)     | 1.655(2)<br>1.616(1)     | 179.0(3)<br>179.1(3)     | 166.87(3)                | 101.13(1) | 65 |

**Table S8.** NBO atomic spin density [ $\Delta$ , in e] on selected atoms in the triple state of the **1**.  
Level of calculations B3LYP–D3/LanL2dz.

|         | $\alpha$ | $\beta$ | $\Delta$ | $\Delta^a$ | $\Delta^b$ |
|---------|----------|---------|----------|------------|------------|
| Cu1     | 14.330   | 13.738  | 0.592    | 0.576      | 0.016      |
| N1      | 3.738    | 3.642   | 0.096    | 0.098      | –0.002     |
| N99     | 3.894    | 3.819   | 0.075    | 0.077      | –0.002     |
| S99     | 8.096    | 8.036   | 0.060    | 0.046      | 0.014      |
| N(1A)   | 3.743    | 3.644   | 0.100    | 0.098      | 0.002      |
| N(99A)  | 3.872    | 3.809   | 0.064    | 0.077      | –0.013     |
| S(99A)  | 8.078    | 8.048   | 0.030    | 0.046      | –0.016     |
| Cu(1A)  | 14.330   | 13.738  | 0.592    | 0.576      | 0.016      |
| N1#     | 3.743    | 3.644   | 0.100    | 0.098      | 0.002      |
| N99#    | 3.872    | 3.809   | 0.064    | 0.077      | –0.013     |
| S99#    | 8.078    | 8.048   | 0.030    | 0.046      | –0.016     |
| N(99A)# | 3.738    | 3.642   | 0.096    | 0.098      | –0.002     |
| S(99A)# | 8.096    | 8.037   | 0.060    | 0.046      | 0.014      |

<sup>a</sup> NBO atomic spin density on selected atoms in the doublet state of the  $[\text{Cu}(\text{mpz})_2(\text{NCS})_2]$  monomer. <sup>b</sup> Differences between the values of the  $\Delta$  and  $\Delta^a$ .

**Table S9.** NBO atomic spin density [ $\Delta$ , in e] on selected atoms in the quartet state of the **2**.  
Level of calculations B3LYP–D3/LanL2dz.

|        | $\alpha$ | $\beta$ | $\Delta$ |
|--------|----------|---------|----------|
| Cu(1)  | 14.344   | 13.750  | 0.594    |
| Cu(2)  | 14.332   | 13.826  | 0.505    |
| N(1)   | 3.751    | 3.648   | 0.103    |
| N(3)   | 3.745    | 3.638   | 0.107    |
| C(98)  | 2.883    | 2.898   | –0.015   |
| N(98)  | 3.885    | 3.818   | 0.068    |
| N(99)  | 3.842    | 3.760   | 0.082    |
| S(98)  | 8.115    | 7.924   | 0.191    |
| S(99)  | 8.110    | 8.075   | 0.034    |
| Cu(1B) | 14.342   | 13.730  | 0.612    |
| N(1B)  | 3.740    | 3.640   | 0.100    |
| N(3B)  | 3.745    | 3.634   | 0.111    |
| N(98B) | 3.875    | 3.813   | 0.063    |
| N(99B) | 3.844    | 3.767   | 0.077    |
| S(98B) | 8.103    | 8.062   | 0.041    |
| S(99B) | 8.101    | 8.059   | 0.042    |
| N(5)   | 3.734    | 3.651   | 0.083    |

|       |       |       |        |
|-------|-------|-------|--------|
| C(97) | 2.911 | 2.921 | -0.010 |
| N(97) | 3.882 | 3.793 | 0.089  |
| S(97) | 8.107 | 8.049 | 0.058  |

**Table S10.** NBO atomic spin density [ $\Delta$ , in e] on selected atoms in the triplet state of the **3** and in the doublet state of the **3**. Level of calculations B3LYP-D3/LanL2dz.

|        | $\alpha$ | $\beta$ | $\Delta$ | $\Delta^a$ | $\Delta^b$ |
|--------|----------|---------|----------|------------|------------|
| Cu(1)  | 14.376   | 13.748  | 0.628    | 0.621      | 0.007      |
| N(3)   | 3.740    | 3.628   | 0.112    | 0.085      | 0.027      |
| N(1)   | 3.816    | 3.758   | 0.057    | 0.075      | -0.018     |
| N(99)  | 3.851    | 3.768   | 0.083    | 0.085      | -0.002     |
| N(98)  | 3.799    | 3.728   | 0.072    | 0.037      | 0.035      |
| S(99)  | 8.129    | 8.066   | 0.063    | 0.065      | -0.002     |
| Cu(2)  | 14.380   | 13.716  | 0.664    | 0.621      | 0.043      |
| N(5)   | 3.725    | 3.632   | 0.093    | 0.085      | 0.008      |
| C(98)  | 2.895    | 2.907   | -0.012   | -0.010     | -0.002     |
| N(7)   | 3.857    | 3.770   | 0.087    | 0.075      | 0.012      |
| N(99A) | 3.854    | 3.779   | 0.075    | 0.085      | -0.010     |
| N(98A) | 3.834    | 3.733   | 0.101    | 0.037      | 0.064      |
| S(97A) | 8.131    | 8.120   | 0.011    | 0.065      | -0.054     |

<sup>a</sup> NBO atomic spin density on selected atoms in the doublet state of the [(bdmpzm)Cu<sup>II</sup>(SCN)<sub>2</sub>( $\mu_{1,3}$ -SCN)Cu<sup>I</sup>(bdmpzm)]. <sup>b</sup> Differences between the values of the  $\Delta$  and  $\Delta^a$ .

**Table S11.** NBO atomic spin density [ $\Delta$ , in e] on selected atoms in the triplet state of the **4** dimer and in the doublet state of the **4**. Level of calculations B3LYP-D3/LanL2dz.

|        | $\alpha$ | $\beta$ | $\Delta$ | $\Delta^a$ | $\Delta^b$ |
|--------|----------|---------|----------|------------|------------|
| Cu(1)  | 14.342   | 13.737  | 0.604    | 0.603      | 0.001      |
| N(1)   | 3.700    | 3.640   | 0.060    | 0.077      | -0.017     |
| N(3)   | 3.831    | 3.735   | 0.096    | 0.085      | 0.011      |
| N(5)   | 3.700    | 3.647   | 0.053    | 0.054      | -0.001     |
| N(99)  | 3.847    | 3.757   | 0.090    | 0.087      | 0.003      |
| S(99)  | 8.146    | 8.065   | 0.081    | 0.111      | -0.03      |
| C(99)  | 2.903    | 2.912   | -0.010   | -0.015     | 0.005      |
| Cu(1A) | 14.342   | 13.738  | 0.604    | 0.603      | 0.001      |
| N(1A)  | 3.700    | 3.640   | 0.059    | 0.077      | -0.018     |
| N(3A)  | 3.831    | 3.735   | 0.096    | 0.085      | 0.011      |
| N(5A)  | 3.700    | 3.647   | 0.053    | 0.054      | -0.001     |

|        |       |       |        |        |       |
|--------|-------|-------|--------|--------|-------|
| N(99A) | 3.848 | 3.757 | 0.090  | 0.087  | 0.003 |
| S(99A) | 8.146 | 8.065 | 0.081  | 0.111  | -0.03 |
| C(99A) | 2.902 | 2.911 | -0.010 | -0.015 | 0.005 |

**Table S12.** Selected bond lengths(Å) and angles(°) for complex **1**.

|                  |                                | experim<br>ental | monomer | dimer  |
|------------------|--------------------------------|------------------|---------|--------|
| <b>Distances</b> |                                |                  |         |        |
|                  | Cu(1)–N(1)                     | 2.015            | 2.014   | 2.017  |
|                  | Cu(1)–N(99)                    | 1.960            | 1.985   | 2.002  |
|                  | Cu(1)–N(1A)                    | 2.014            | 2.014   | 2.003  |
|                  | Cu(1)–N(99A)                   | 1.959            | 1.985   | 2.018  |
|                  | Cu(1)–Cu(1#)                   | 5.622            | -       | 5.303  |
| <b>Angles</b>    |                                |                  |         |        |
|                  | Cu(1)–N(1)–N(2)                | 123.78           | 118.35  | 117.22 |
|                  | Cu(1)–N(99)–C(99)              | 166.78           | 150.79  | 146.99 |
|                  | Cu(1)–N(1A)–N(2A)              | 123.78           | 118.35  | 119.24 |
|                  | Cu(1)–N(99A)–C(99A)            | 166.78           | 150.80  | 151.34 |
|                  | N(1)–Cu(1)– N(99)              | 90.08            | 88.51   | 88.69  |
|                  | N(1)–Cu(1)– N(99A)             | 89.92            | 91.88   | 90.75  |
|                  | N(99)–Cu(1)–N(1A)              | 89.90            | 91.88   | 93.01  |
|                  | N(1A)–Cu(1)–N(99A)             | 90.10            | 88.51   | 88.54  |
|                  | N(99A)– N(1A)– N(99)–<br>Cu(1) | 0.10             | 4.63    | 10.21  |
|                  | N(99)–N(1)– N(99A)–Cu(1)       | 0.08             | 4.63    | 10.16  |

**Table S13.** Selected bond lengths(Å) and angles(°) for complex **2**.

|                  |                       | experimental | dimer  |
|------------------|-----------------------|--------------|--------|
| <b>Distances</b> |                       |              |        |
|                  | Cu(1)–N(1)            | 1.971        | 1.972  |
|                  | Cu(1)–N(3)            | 1.983        | 1.972  |
|                  | Cu(1)–N(98)           | 1.980        | 1.990  |
|                  | Cu(1)–N(99)           | 1.949        | 2.091  |
|                  | Cu(1)–Cu(2)           | 6.52         | 5.224  |
|                  | Cu(1)–Cu(1#)          | 6.51         | 5.029  |
| <b>Angles</b>    |                       |              |        |
|                  | N(1)–Cu(1)–N(3)       | 176.34       | 172.04 |
|                  | N(99)–Cu(1)–N(98)     | 161.58       | 148.32 |
|                  | N(1)–N(98)–N(3)–Cu(1) | 2.590        | 4.64   |
|                  | N(1)–N(99)–N(3)–Cu(1) | 2.59         | 5.48   |

**Table S14.** Selected bond lengths(Å) and angles(°) for complex **3**.

|                  |             | experimental | monomer | dimer |
|------------------|-------------|--------------|---------|-------|
| <b>Distances</b> |             |              |         |       |
|                  | Cu(1)–Cu(2) | 6.17         | 5.538   | 5.650 |
|                  | Cu(1)–N(1)  | 2.046        | 2.068   | 2.275 |

|               |                         |        |       |        |
|---------------|-------------------------|--------|-------|--------|
|               | Cu(1)–N(3)              | 2.067  | 2.248 | 2.048  |
|               | Cu(1)–N(97)             | 2.130  | 2.015 | 2.045  |
|               | Cu(1)–N(98)             | 1.959  | 1.998 | 1.991  |
|               | Cu(1)–N(99)             | 1.983  | 2.152 | 2.041  |
| <b>Angles</b> |                         |        |       |        |
|               | N(3)–Cu(1)–N(1)         | 86.97  | 86.93 | 86.46  |
|               | N(97)–Cu(1)–N(98)       | 102.05 | 92.04 | 153.10 |
|               | N(98)–Cu(1)–N(99)       | 90.03  | 88.26 | 90.38  |
|               | N(97)–N(98)–N(99)–Cu(1) | 44.92  | 11.88 | 18.47  |

**Table S15.** Selected bond lengths(Å) and angles(°) for complex 4.

|                  |                      | experimental | monomer | dimer  |
|------------------|----------------------|--------------|---------|--------|
| <b>Distances</b> |                      |              |         |        |
|                  | Cu(1)–N(1)           | 2.029        | 2.070   | 2.087  |
|                  | Cu(1)–N(3)           | 1.956        | 2.040   | 2.010  |
|                  | Cu(1)–N(5)           | 2.080        | 2.129   | 2.128  |
|                  | Cu(1)–N(98)          | 2.134        | 2.161   | 2.134  |
|                  | Cu(1)–N(99)          | 1.911        | 1.923   | 1.912  |
|                  | Cu(1)–Cu(1A)         | 8.47         |         | 5.42   |
| <b>Angles</b>    |                      |              |         |        |
|                  | N(1)–Cu(1)–N(3)      | 78.06        | 77.58   | 77.88  |
|                  | N(3)–Cu(1)–N(5)      | 77.74        | 76.30   | 77.03  |
|                  | N(3)–Cu(1)–N(98)     | 95.80        | 85.63   | 90.01  |
|                  | N(3)–Cu(1)–N(99)     | 165.78       | 162.53  | 171.55 |
|                  | N(98)–Cu(1)–N(99)    | 98.40        | 111.84  | 98.40  |
|                  | N(1)–N(3)–N(5)–Cu(1) | 12.72        | 10.10   | 12.22  |

**Table S16.** Mixed valence Cu(II)/Cu(I) complexes based on the thiocyanato ion.

| Compound name                                                                                                                       | Ligand               | Preparation method                                                                                                        | Reference |
|-------------------------------------------------------------------------------------------------------------------------------------|----------------------|---------------------------------------------------------------------------------------------------------------------------|-----------|
| $[\text{Cu}^{\text{II}}_2(\text{L})_2(\text{NCS})_2][\text{Cu}^{\text{I}}(\text{SCN})(\mu_{1,1}\text{-SCN})(\mu_{1,3}\text{-SCN})]$ |                      | $\text{Cu}(\text{ClO}_4)_2 \cdot 6\text{H}_2\text{O}$ ,<br>MeOH, rt                                                       | 22        |
| $\{[\text{Cu}^{\text{II}}_2(\text{L})_2][\text{Cu}^{\text{I}}_4(\mu_{1,3}\text{-SCN})_4(\mu_{1,1,3}\text{-SCN})_2]\}_n$             |                      | $\text{Cu}(\text{CH}_3\text{COO})_2$ ,<br>MeOH, rt                                                                        | 22        |
| $[\text{Cu}_2^{\text{I}}\text{Cu}^{\text{II}}(\text{pyz})_2(\text{C}_5\text{O}_5)_2(\text{H}_2\text{O})_2]_n$                       | pyrazine             | $\text{Cu}(\text{NO}_3)_2 \cdot 3\text{H}_2\text{O}$ ,<br>MeOH/ $\text{H}_2\text{O}$ ,<br>solvothermal<br>synthesis, 393K | 20        |
| $[\text{Cu}_8^{\text{I}}\text{Cu}_2^{\text{II}}(\text{CN})_4(\text{NCS})_8(\text{C}_6\text{H}_8\text{N}_2)_7]$                      | 2,6-dimethylpyrazine | $\text{CuSCN}$ ,<br>MeCN/solvothermal                                                                                     | 92        |

|                                                                                                                                               |                                                                                     |                                                                                                              |     |
|-----------------------------------------------------------------------------------------------------------------------------------------------|-------------------------------------------------------------------------------------|--------------------------------------------------------------------------------------------------------------|-----|
| $[\text{Cu}^{\text{I}}_2\text{Cu}^{\text{II}}(\text{admtrz})_6(\text{SCN})_2](\text{ClO}_4)_2$                                                | 4-amino-3,5-dimethyl-1,2,4-triazole                                                 | synthesis, 413K<br>$\text{Cu}(\text{ClO}_4)_2 \cdot 6\text{H}_2\text{O}$ ,<br>EtOH/ $\text{H}_2\text{O}$ /rt | 97  |
| $\text{Cu}_2(\text{L})(\mu_{1,3}\text{-SCN})_2(\text{SCN})_n$                                                                                 | 4 $\phi$ -(4-pyridyl)-2,2 $\phi$ :6 $\phi$ ,2 $\phi$ $\phi$ -terpyridine            | $\text{CuCl}_2 \cdot 2\text{H}_2\text{O}$ ,<br>EtOH, solvothermal<br>synthesis, 413K                         | 32  |
| $\{[\text{Cu}(\text{C}_{21}\text{H}_{15}\text{N}_3)_2][\text{Cu}_2(\text{NCS})_4]\}_n$                                                        | 4'-phenyl-2,2':6',2''-terpyridine                                                   | $\text{Cu}(\text{CH}_3\text{COO})_2 \cdot \text{H}_2\text{O}$ ,<br>EtOH, solvothermal<br>synthesis, 473K     | 93  |
| $\{[\text{Cu}(\text{C}_{20}\text{H}_{14}\text{N}_4)_2][\text{Cu}_2(\text{NCS})_4]\}_n$                                                        | 4'-(3-pyridyl)-2,2':6',2''-terpyridine                                              | $\text{Cu}(\text{CH}_3\text{COO})_2 \cdot \text{H}_2\text{O}$<br>EtOH, solvothermal<br>synthesis, 413K       | 94  |
| $\{[\text{Cu}(\text{bpzm})(\text{SCN})][\text{Cu}(\text{bpzm})(\text{MeOH})][\text{Cu}(\text{SCN})_4]\}_n$                                    | bis(pyrazol-1-yl)methane                                                            | $\text{CuCl}_2 \cdot 2\text{H}_2\text{O}$ ,<br>MeOH/ $\text{H}_2\text{O}$ ,rt                                | 13  |
| $\{[\text{Cu}_2(\text{bpzm})_2(\mu\text{-SCN})(\text{SCN})_3]\}_n$                                                                            | bis(pyrazol-1-yl)methane                                                            | $\text{CuCl}_2 \cdot 2\text{H}_2\text{O}$ ,<br>MeOH/ $\text{H}_2\text{O}$ ,rt                                | 13  |
| $\text{Cu}_2(\text{SCN})_2(2\text{-PyBIm})(2\text{-PyHBIm})_n$                                                                                | 2-(n-pyridyl)benzimidazole                                                          | $\text{CuSCN}$ , MeCN,<br>solvothermal<br>synthesis, 443K                                                    | 96  |
| $[\text{Cu}(\text{DMF})_4][\text{Cu}(\text{SCN})_4(\text{CN})_2]$                                                                             | DMF                                                                                 | dissolution of copper,<br>DMF/propanol;<br>synthesis, 373K                                                   | 23  |
| $\{[\text{KCu}^{\text{II}}_6(\text{bdap})_6(\mu_{1,3}\text{-SCN})_3\text{Cu}^{\text{I}}(\text{NCS})](\text{SCN})_4\}_n$                       | 1,3-bis(amino)-2-propanol                                                           | $\text{Cu}(\text{NO}_3)_2 \cdot 3\text{H}_2\text{O}$ ,<br>EtOH/ $\text{H}_2\text{O}$ , rt                    | 95  |
| $\{[\text{Cu}^{\text{II}}_2(\mu\text{-L})(\mu\text{-H}_2\text{O})3\text{H}_2\text{O}][\text{Cu}^{\text{I}}\text{-}\mu(1,3\text{-NCS})_2]\}_n$ | imidazolidinyl phenolate Schiff base                                                | $\text{Cu}(\text{ClO}_4)_2 \cdot 6\text{H}_2\text{O}$ ,<br>MeOH/MeCN, rt                                     | 25a |
| $(\text{L})\text{Cu}_2(\text{SCN})_3_n$                                                                                                       | 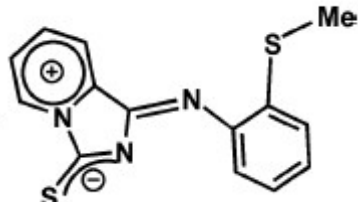 | $\text{Cu}(\text{ClO}_4)_2 \cdot 6\text{H}_2\text{O}$<br>$\text{CH}_2\text{Cl}_2/\text{MeOH}$ , rt           | 26  |
| $[\text{Cu}^{\text{II}}\text{Cu}^{\text{I}}(\text{L})(\mu\text{-SCN})(\mu_3\text{-SCN})_n$                                                    | N'-((pyridin-2-yl)methylene)acetohydrazide                                          | $\text{Cu}(\text{CH}_3\text{COO})_2 \cdot \text{H}_2\text{O}$<br>MeCN/MeOH/ $\text{H}_2\text{O}$ ,rt         | 21  |
| $[\text{Cu}(\text{NCS})(\text{tpea})][\text{Cu}(\text{NCS})_2]$                                                                               | tris(2-pyrazolyloethyl)amine (tpea)                                                 | $\text{CuCl}_2 \cdot 2\text{H}_2\text{O}$ ,<br>EtOH/acetone, rt                                              | 19  |
| $[\text{Na}(\text{Cu}^{\text{II}}\text{L}_2)][\text{Cu}^{\text{I}}_2(\mu_{1,3}\text{-NCS})_3]_n$                                              | N,N-bis(3-ethoxysalicylideneimino)-1,3-diaminopropane                               | $\text{Cu}(\text{CH}_3\text{COO})_2 \cdot \text{H}_2\text{O}$<br>MeOH/ $\text{H}_2\text{O}$ , rt             | 98  |
| $[\{(\text{Cu}^{\text{II}}\text{L}_2)\} \{ \text{Cu}^{\text{I}}_4(\mu_{1,3}\text{-SCN})_2(\mu_{1,1,3}\text{-SCN})_4 \}]_n$                    | 3-[2-(dimethylamino)ethylimino]butan-2-one oxime                                    | $\text{Cu}(\text{ClO}_4)_2 \cdot 6\text{H}_2\text{O}$ ,<br>EtOH/ $\text{H}_2\text{O}$ /rt                    | 25b |
| $[\{(\text{Cu}^{\text{II}}\text{L}_2)\} \{ \text{Cu}^{\text{I}}_2(\mu_{1,3}\text{-SCN})_2(\mu_{1,1,3}\text{-SCN})_2 \}]_n$                    | 3-[2-(diethylamino)ethylimino]butan-2-one oxime                                     | $\text{Cu}(\text{ClO}_4)_2 \cdot 6\text{H}_2\text{O}$ ,<br>EtOH/ $\text{H}_2\text{O}$ /rt                    | 25b |

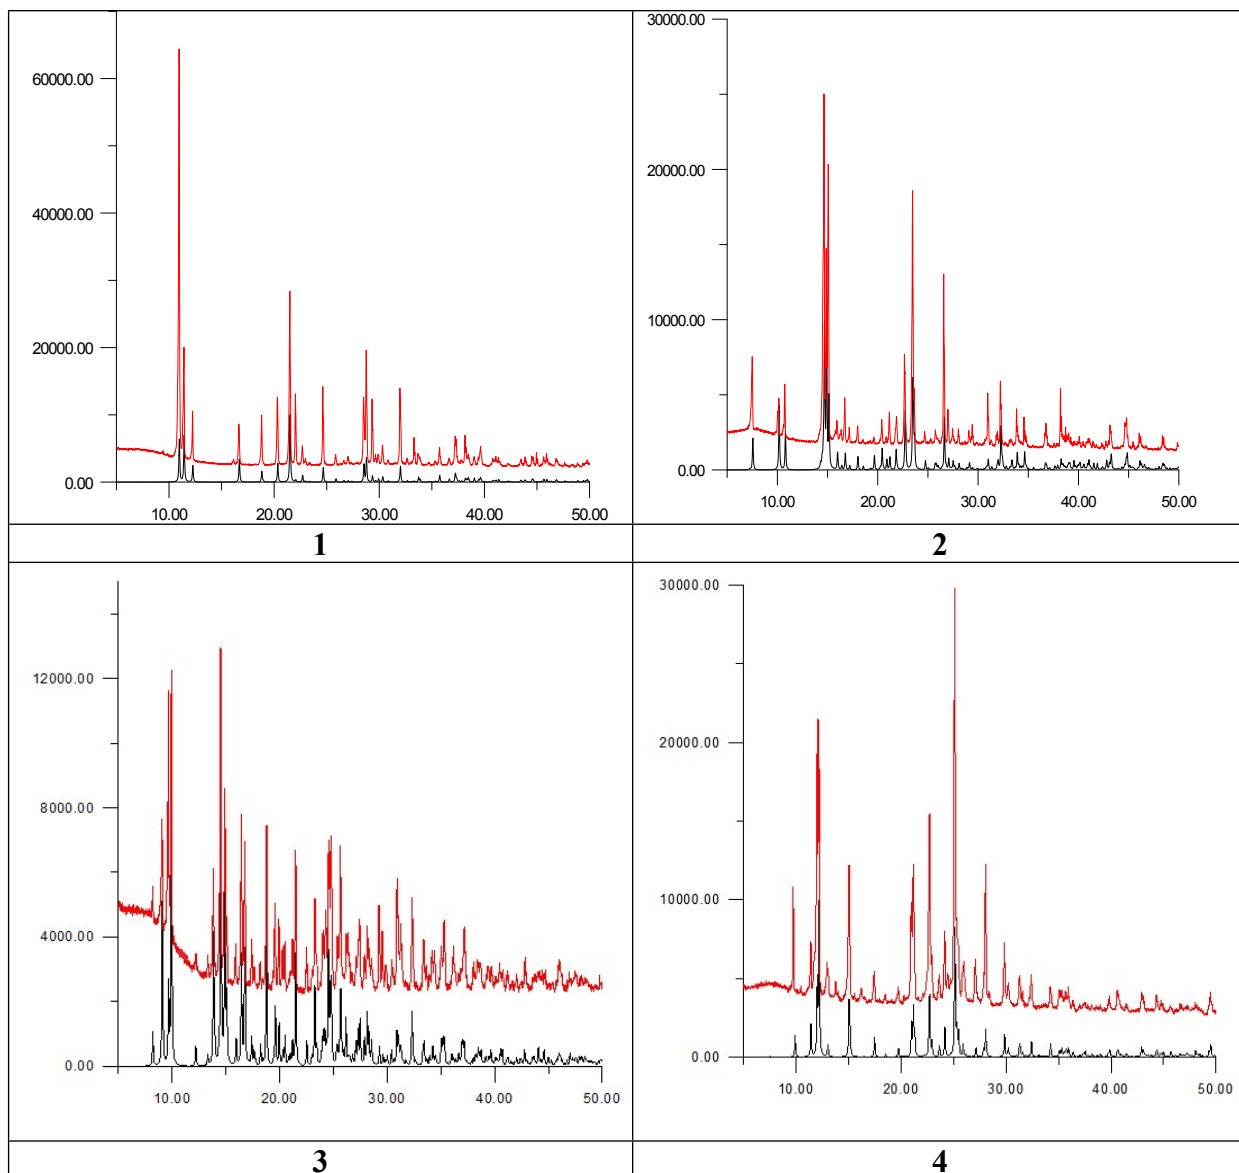

**Figure S1.** The powder XRD pattern of compounds 1–4 (experimental – red) and the simulation of the powder pattern from the crystal structure (black).

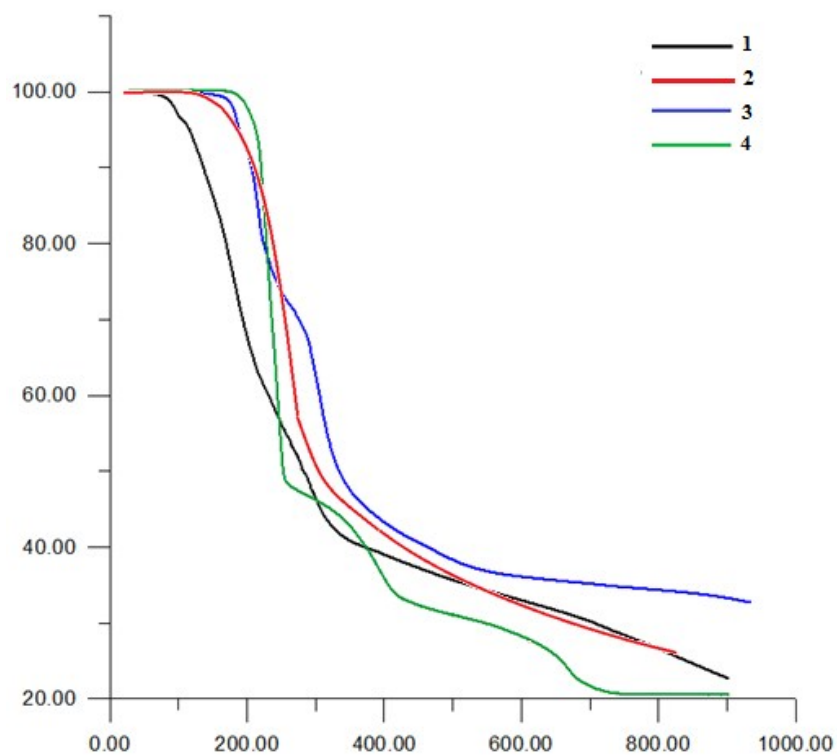

**Figure S2.** TG curves for complexes **1**, **2**, **3** and **4**.

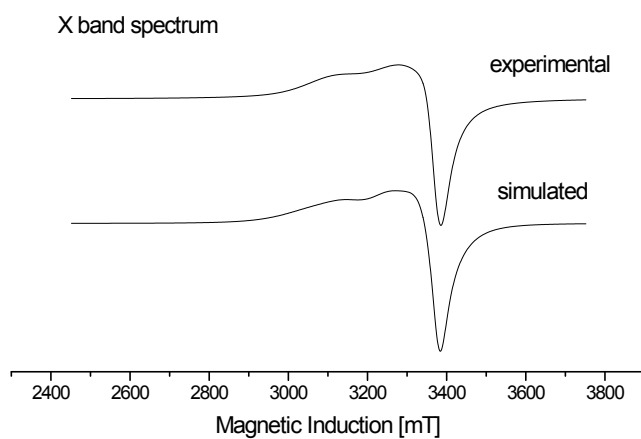

**Figure S3.** X band spectrum of the complex **1**; experimental and simulated spectrum  
 $g_x = 2.067$ ;  $g_y = 2.102$ ,  $g_z = 2.23$        $g_{av} = 2.14$



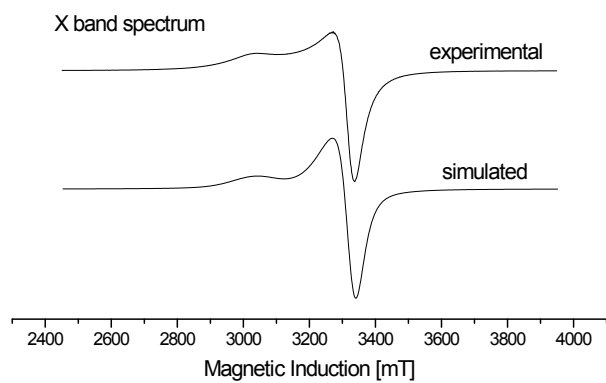

**Figure S4.** X band spectrum of the complex **2**; experimental and simulated spectrum  
 $g_x = 2.067$ ;  $g_y = 2.07$ ,  $g_z = 2.25$   $g_{av} = 2.13$

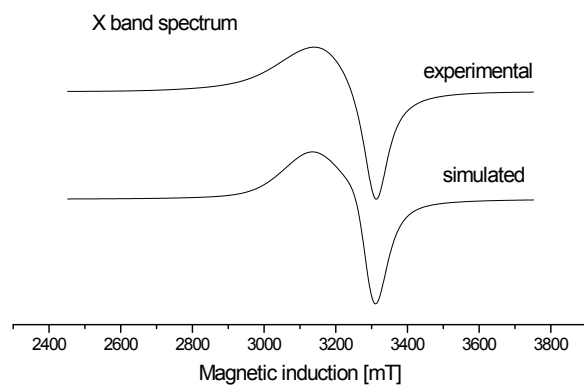

**Figure S5.** X band spectrum of the complex **3**; experimental and simulated spectrum  
 $g_x = 2.081$ ;  $g_y = 2.161$ ,  $g_z = 2.161$   $g_{av} = 2.13$

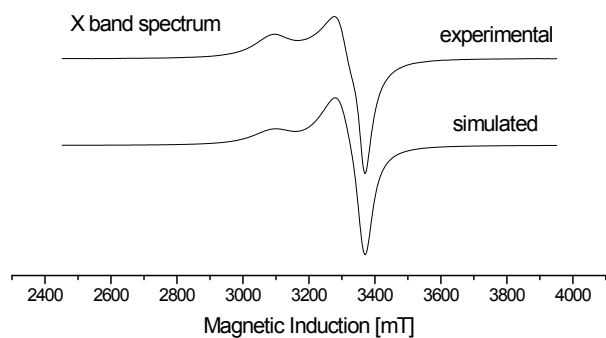

**Figure S6.** X band spectrum of the complex **4**; experimental and simulated spectrum  
 $g_x = 2.07$ ;  $g_y = 2.107$ ,  $g_z = 2.161$   $g_{av} = 2.12$

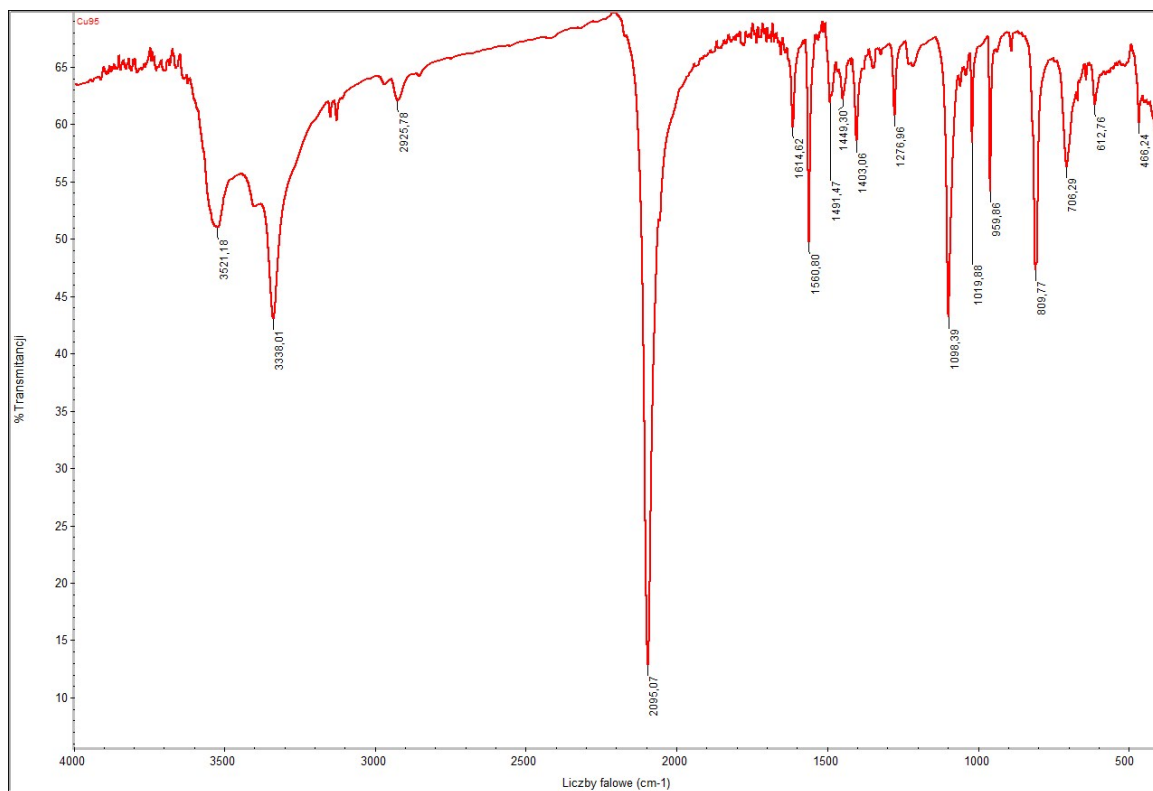

Figure S7. IR spectrum for 1.

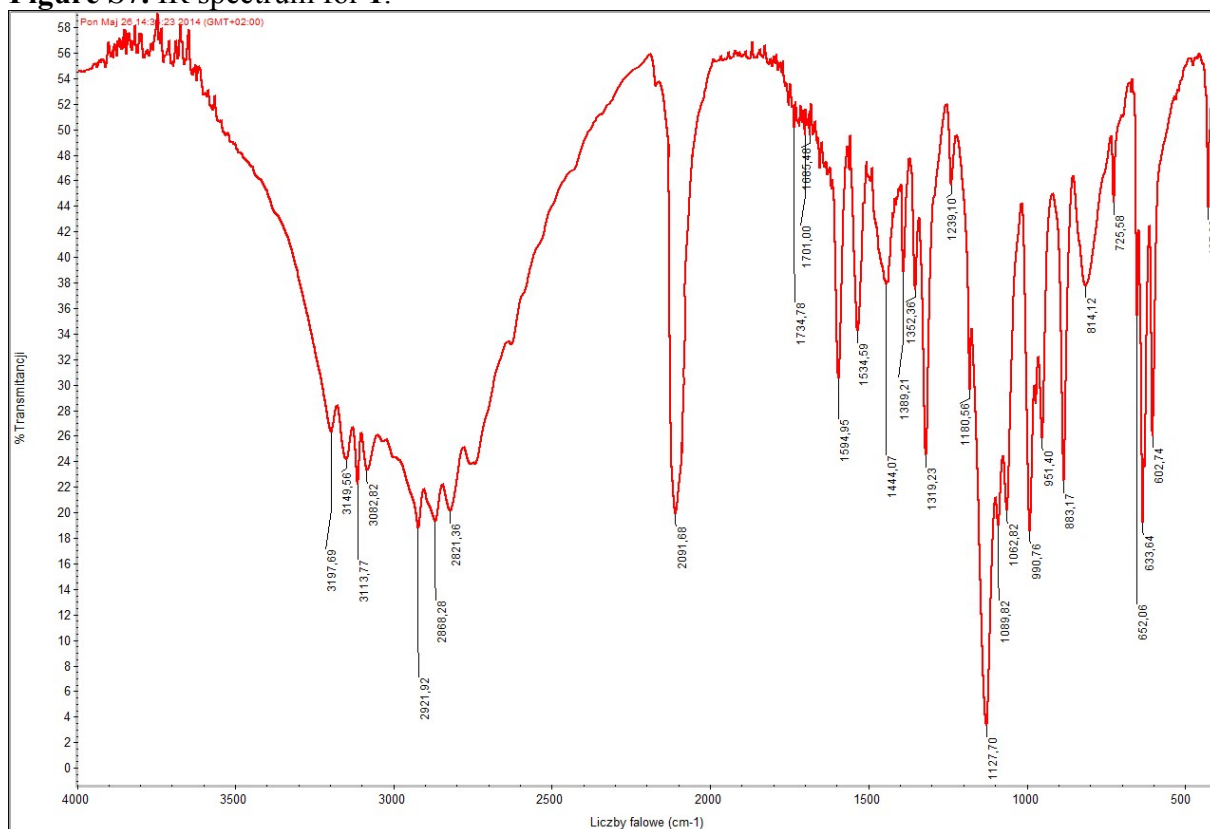

Figure S8. IR spectrum for 2.

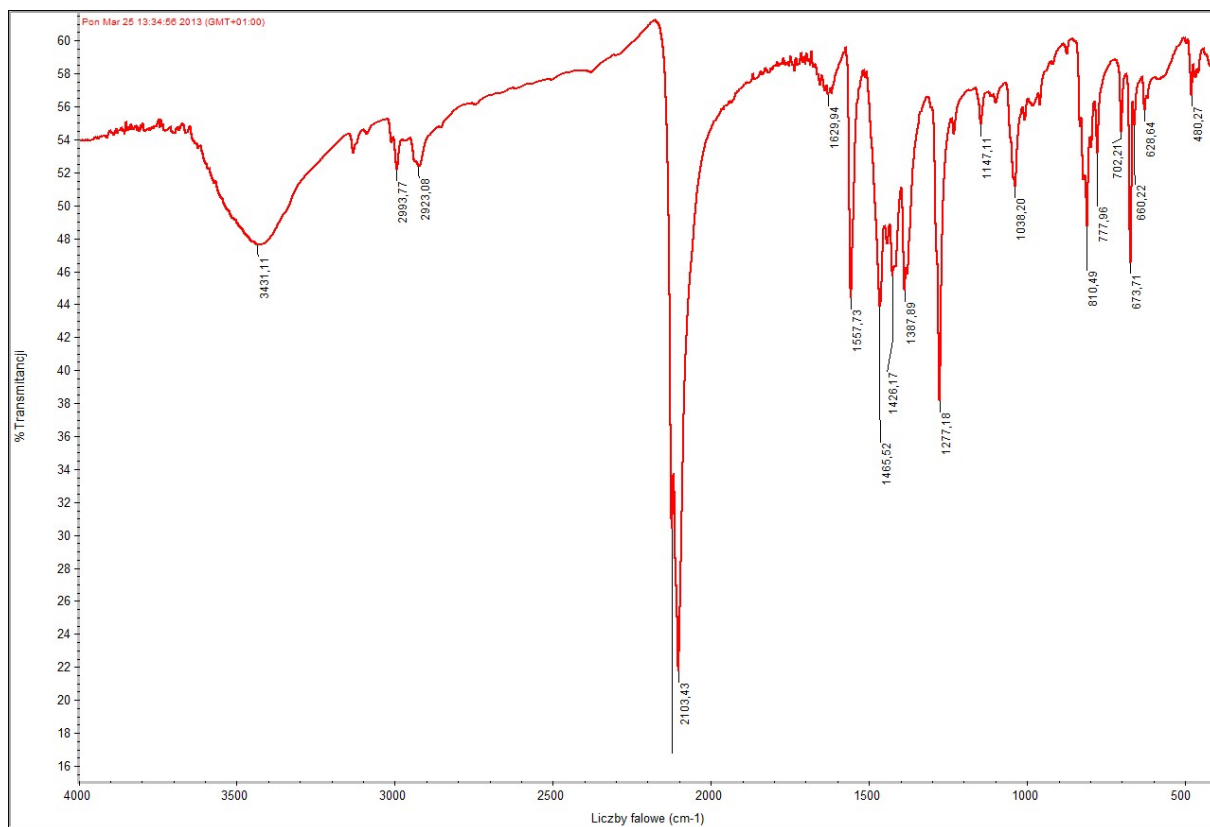

**Figure S9.** IR spectrum for **3**.

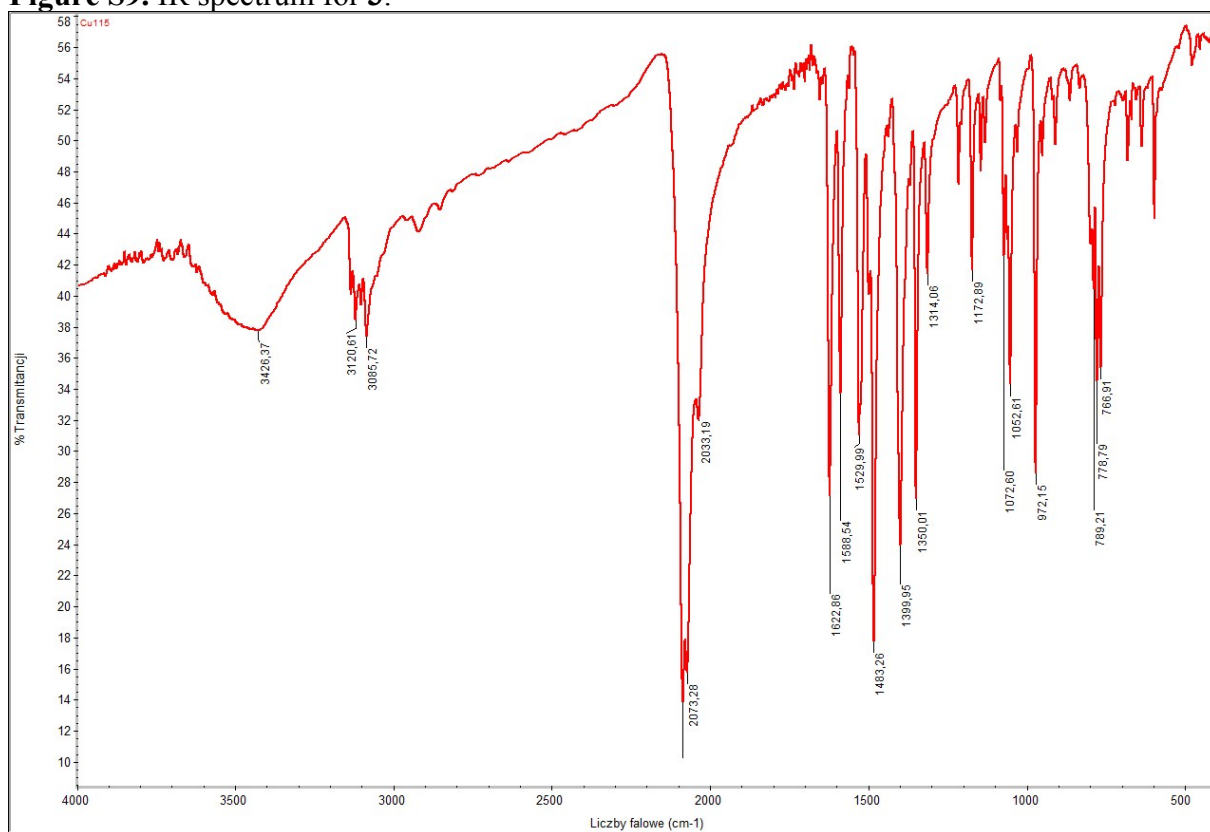

**Figure S10.** IR spectrum for **4**.
